# Supplementary material for: Evaluation of IRX Genes and Conserved Noncoding Elements in a Region on 5p13.3 Linked to Families with Familial Idiopathic Scoliosis and Kyphosis
Source: PubMed Central journal article supplement (PMC4889666; doi:10.1534/g3.116.029975), 2016-04-12
Supplement: supp_g3.116.029975_FigureS1.pdf [file supp_g3.116.029975_FigureS1.pdf]

Figure S1.

A

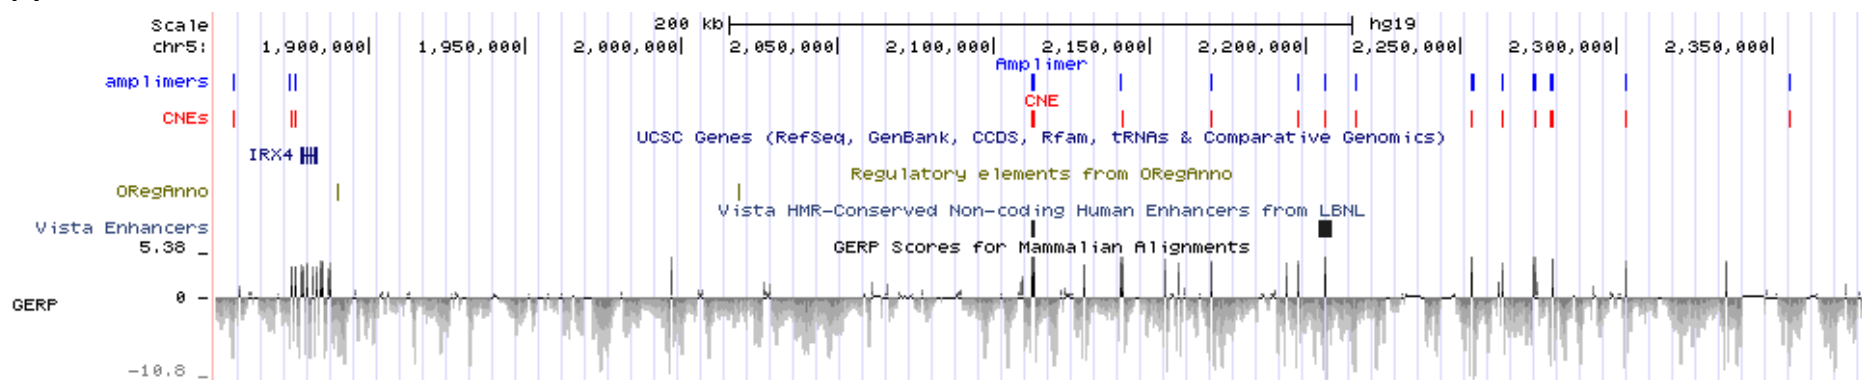

B

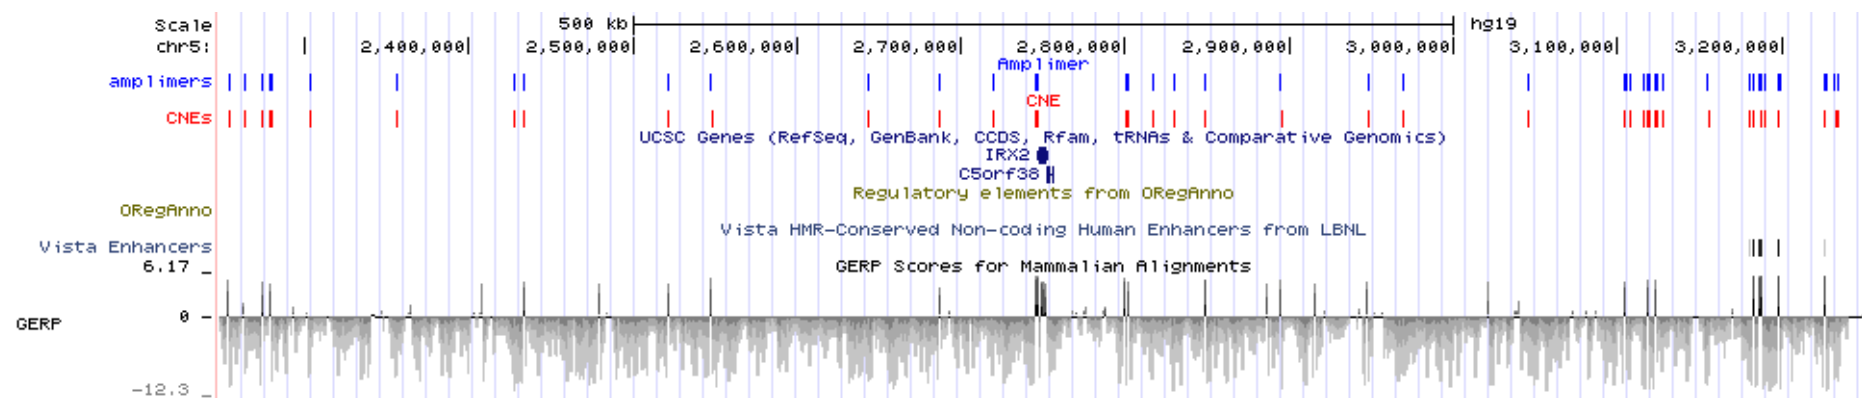

C

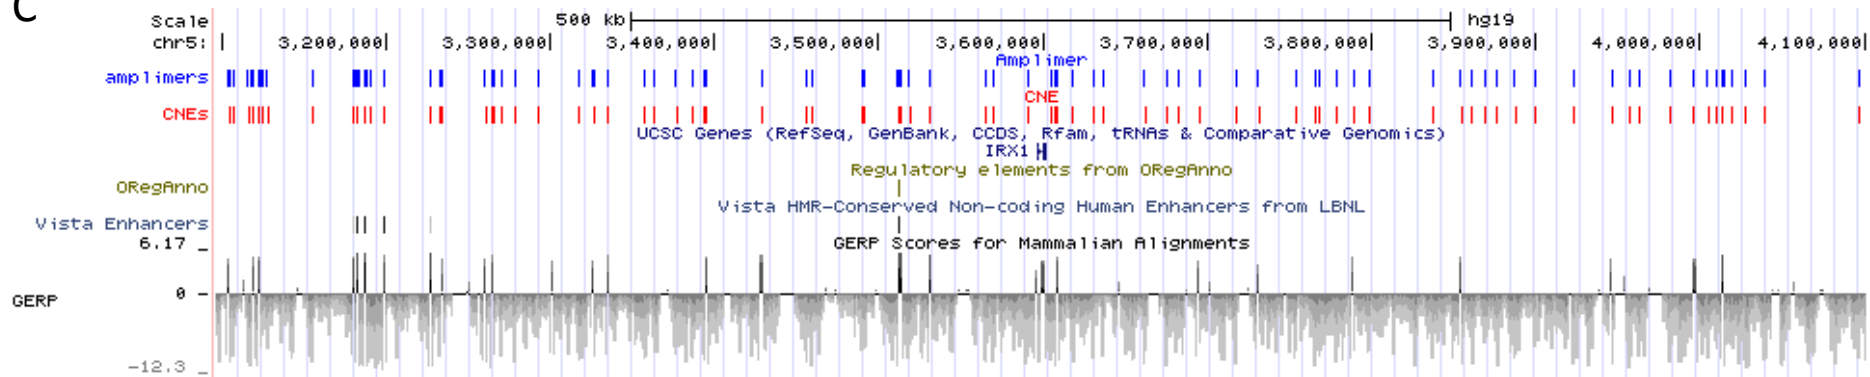

Figure S1 Regional plots of sequenced CNEs and the amplimers used to capture them surrounding *IRX4* (A), *IRX2* (B) and *IRX1* (C). Map positions are from GRCh37/hg19. Regulatory regions annotated with ORegAnno or Vista are depicted ([genome.ucsc.edu](http://genome.ucsc.edu)). Evolutionary constraint is indicated using Genomic Evolutionary Rate Profiling (GERP) scores.
