# Supplementary material for: Evaluation of IRX Genes and Conserved Noncoding Elements in a Region on 5p13.3 Linked to Families with Familial Idiopathic Scoliosis and Kyphosis
Source: PubMed Central journal article supplement (PMC4889666; doi:10.1534/g3.116.029975), 2016-04-12
Supplement: supp_g3.116.029975_TableS1.pdf [file supp_g3.116.029975_TableS1.pdf]

**Table S1.** Position (GRCh37/hg19) of amplimers and the CNEs they target.

| Amplimer Regions |         |           | CNEs     |         |
|------------------|---------|-----------|----------|---------|
| bp start         | bp end  | Passed QC | bp start | bp end  |
| 1855935          | 1856624 | Y         | 1856012  | 1856162 |
| 1874215          | 1874844 | Y         | 1874705  | 1875194 |
| 1874908          | 1875625 | N         |          |         |
| 1874929          | 1875577 | N         |          |         |
| 1875884          | 1876614 | Y         | 1875963  | 1876420 |
| 1884332          | 1885066 | N         | 1884358  | 1884895 |
| 1884358          | 1885019 | N         |          |         |
| 1886739          | 1887443 | N         | 1886905  | 1887421 |
| 1886880          | 1887583 | N         |          |         |
| 1887255          | 1887928 | N         |          |         |
| 2112338          | 2112861 | Y         | 2112466  | 2113237 |
| 2112693          | 2113379 | Y         |          |         |
| 2140820          | 2141511 | Y         | 2140936  | 2141306 |
| 2169746          | 2170420 | Y         | 2169810  | 2169944 |
| 2197414          | 2198078 | Y         | 2197516  | 2197794 |
| 2206198          | 2206953 | Y         | 2206223  | 2206617 |
| 2215637          | 2216341 | N         | 2215811  | 2215987 |
| 2215764          | 2216485 | Y         |          |         |
| 2253158          | 2253627 | Y         | 2253248  | 2253694 |
| 2253158          | 2253627 | Y         |          |         |
| 2253444          | 2254155 | N         |          |         |
| 2253444          | 2254155 | Y         |          |         |
| 2263178          | 2263879 | Y         | 2263308  | 2263475 |
| 2273200          | 2273939 | Y         | 2273374  | 2273665 |
| 2273200          | 2273939 | Y         |          |         |
| 2278397          | 2279092 | Y         | 2278519  | 2278644 |
| 2279112          | 2279756 | Y         | 2279172  | 2279306 |
| 2279112          | 2279756 | Y         |          |         |
| 2302573          | 2303283 | Y         | 2302693  | 2302937 |
| 2302573          | 2303283 | Y         |          |         |
| 2355333          | 2356022 | Y         | 2355411  | 2355522 |
| 2427214          | 2427919 | Y         | 2427354  | 2427541 |
| 2432849          | 2433503 | N         | 2433018  | 2433368 |
| 2432921          | 2433669 | Y         |          |         |
| 2521064          | 2521817 | Y         | 2521088  | 2521367 |
| 2547265          | 2548001 | Y         | 2547376  | 2547518 |
| 2643153          | 2643870 | Y         | 2643291  | 2643591 |
| 2686551          | 2687234 | Y         | 2686633  | 2686838 |
| 2718526          | 2719208 | Y         | 2718690  | 2718881 |
| 2744973          | 2745710 | Y         | 2745040  | 2745475 |
| 2746141          | 2746846 | Y         | 2746281  | 2746660 |
| 2751268          | 2751876 | N         | 2751271  | 2751902 |
| 2751773          | 2752304 | N         |          |         |
| 2799461          | 2800166 | Y         | 2799510  | 2800006 |
| 2801399          | 2802094 | Y         | 2801556  | 2801870 |
| 2816070          | 2816659 | Y         | 2816243  | 2816515 |
| 2829363          | 2830067 | Y         | 2829419  | 2829634 |
| 2848447          | 2849132 | Y         | 2848528  | 2848888 |
| 2894377          | 2895084 | Y         | 2894455  | 2894774 |
| 2947409          | 2948096 | Y         | 2947463  | 2947886 |
| 2969243          | 2969968 | Y         | 2969354  | 2969579 |
| 3045582          | 3046281 | Y         | 3045674  | 3045942 |

|         |         |   |         |         |
|---------|---------|---|---------|---------|
| 3103820 | 3104582 | Y | 3103963 | 3104671 |
| 3104476 | 3105156 | Y |         |         |
| 3106817 | 3107506 | Y | 3106873 | 3106969 |
| 3115517 | 3115944 | Y | 3115745 | 3115846 |
| 3117877 | 3118564 | Y | 3118036 | 3118164 |
| 3118493 | 3119179 | Y | 3118618 | 3119264 |
| 3119075 | 3119775 | Y |         |         |
| 3122357 | 3123038 | Y | 3122429 | 3122970 |
| 3123408 | 3124153 | Y | 3123946 | 3124403 |
| 3124185 | 3124925 | Y |         |         |
| 3127289 | 3127993 | Y | 3127466 | 3127574 |
| 3154708 | 3155397 | Y | 3154824 | 3154927 |
| 3179679 | 3180382 | Y | 3179855 | 3180348 |
| 3180193 | 3180889 | Y |         |         |
| 3182176 | 3182863 | Y | 3182341 | 3183128 |
| 3182734 | 3183336 | Y |         |         |
| 3186431 | 3187129 | Y | 3186570 | 3187850 |
| 3186999 | 3187685 | Y |         |         |
| 3187567 | 3188196 | Y |         |         |
| 3189564 | 3190310 | Y | 3189696 | 3189751 |
| 3197946 | 3198718 | Y | 3198055 | 3198683 |
| 3198619 | 3199289 | Y |         |         |
| 3226128 | 3226776 | Y | 3226301 | 3227205 |
| 3226622 | 3227274 | Y |         |         |
| 3231893 | 3232662 | Y | 3232229 | 3232307 |
| 3233942 | 3234654 | Y | 3234009 | 3234156 |
| 3259970 | 3260676 | Y | 3260136 | 3260616 |
| 3264152 | 3264915 | Y | 3264289 | 3264485 |
| 3264942 | 3265673 | Y | 3264927 | 3264997 |
| 3269558 | 3270160 | Y | 3269635 | 3269708 |
| 3278276 | 3278806 | Y | 3278361 | 3278520 |
| 3292225 | 3292942 | Y | 3292436 | 3292553 |
| 3317398 | 3318100 | Y | 3317456 | 3317542 |
| 3325623 | 3326308 | Y | 3325761 | 3326322 |
| 3326083 | 3326730 | Y |         |         |
| 3334660 | 3335389 | Y | 3334777 | 3335050 |
| 3357261 | 3357959 | Y | 3357396 | 3357767 |
| 3363061 | 3363753 | Y | 3363166 | 3363410 |
| 3376086 | 3376679 | Y | 3376261 | 3376422 |
| 3386147 | 3386808 | Y | 3386317 | 3386464 |
| 3393690 | 3394381 | Y | 3393797 | 3394204 |
| 3394830 | 3395540 | Y | 3394906 | 3395416 |
| 3427994 | 3428673 | Y | 3428124 | 3428559 |
| 3455416 | 3456136 | Y | 3455600 | 3455834 |
| 3458814 | 3459521 | Y | 3458989 | 3459106 |
| 3489530 | 3490209 | Y | 3489666 | 3489937 |
| 3491144 | 3491869 | Y | 3491204 | 3491247 |
| 3511131 | 3511892 | Y | 3511507 | 3513870 |
| 3512212 | 3512982 | Y |         |         |
| 3512791 | 3513461 | Y |         |         |
| 3513323 | 3514014 | Y |         |         |
| 3518238 | 3518904 | Y | 3518332 | 3518417 |
| 3530705 | 3531426 | Y | 3530767 | 3531379 |
| 3564307 | 3565053 | Y | 3564456 | 3564877 |
| 3569508 | 3570199 | Y | 3569600 | 3569741 |

|         |         |   |         |         |
|---------|---------|---|---------|---------|
| 3589958 | 3590690 | N | 3590136 | 3590241 |
| 3589963 | 3590615 | Y |         |         |
| 3590716 | 3591422 | Y | 3590820 | 3591127 |
| 3595589 | 3596197 | N | 3595775 | 3596096 |
| 3595660 | 3596256 | N |         |         |
| 3604559 | 3605228 | Y | 3604701 | 3604849 |
| 3604640 | 3605343 | N |         |         |
| 3607241 | 3607932 | Y | 3607388 | 3607464 |
| 3607910 | 3608604 | Y | 3608004 | 3609004 |
| 3608481 | 3609139 | Y |         |         |
| 3617890 | 3618590 | Y | 3618033 | 3618232 |
| 3630120 | 3630827 | N | 3630271 | 3630431 |
| 3630209 | 3630894 | Y |         |         |
| 3636342 | 3637042 | N | 3636457 | 3636676 |
| 3636390 | 3637106 | Y |         |         |
| 3661475 | 3662173 | Y | 3661617 | 3661813 |
| 3674780 | 3675476 | Y | 3674899 | 3674954 |
| 3681980 | 3682496 | Y | 3682153 | 3682317 |
| 3694418 | 3695175 | Y | 3694513 | 3694761 |
| 3717349 | 3718105 | Y | 3717503 | 3717614 |
| 3730618 | 3731247 | Y | 3730786 | 3730862 |
| 3753198 | 3753917 | Y | 3753328 | 3753433 |
| 3765202 | 3765865 | Y | 3765352 | 3765429 |
| 3765275 | 3765961 | N |         |         |
| 3767853 | 3768625 | Y | 3768295 | 3768453 |
| 3778169 | 3778866 | Y | 3778277 | 3778400 |
| 3788288 | 3788986 | Y | 3788352 | 3788406 |
| 3797746 | 3798425 | Y | 3797883 | 3797948 |
| 3836862 | 3837596 | Y | 3836923 | 3837144 |
| 3853995 | 3854691 | Y | 3854074 | 3854533 |
| 3860806 | 3861506 | Y | 3860986 | 3861036 |
| 3868532 | 3869140 | Y | 3868666 | 3868843 |
| 3876205 | 3876881 | Y | 3876331 | 3876419 |
| 3886774 | 3887184 | Y | 3886903 | 3887040 |
| 3899142 | 3899831 | Y | 3899328 | 3899400 |
| 3922562 | 3923330 | Y | 3922677 | 3922773 |
| 3945821 | 3946419 | Y | 3945950 | 3946059 |
| 3956713 | 3957434 | Y | 3956775 | 3956907 |
| 3962253 | 3963025 | Y | 3962734 | 3962829 |
| 3981065 | 3981699 | Y | 3981173 | 3981363 |
| 3995880 | 3996543 | Y | 3996053 | 3996492 |
| 4003867 | 4004463 | Y | 4004313 | 4004481 |
| 4009933 | 4010634 | Y | 4010062 | 4010185 |
| 4013606 | 4014077 | Y | 4013683 | 4014372 |
| 4013855 | 4014565 | Y |         |         |
| 4019099 | 4019768 | Y | 4019177 | 4019473 |
| 4027190 | 4027899 | Y | 4027351 | 4027590 |
| 4039051 | 4039756 | Y | 4039210 | 4039489 |
| 4096559 | 4097043 | Y | 4096713 | 4096843 |
